# Supplementary material for: Cov2MS: An Automated and Quantitative Matrix-Independent Assay for Mass Spectrometric Measurement of SARS-CoV-2 Nucleocapsid Protein
Source: PubMed Central journal article supplement (PMC9773173; doi:10.1021/acs.analchem.2c01610), 2022-12-09
Supplement: ac2c01610_si_001.pdf [file ac2c01610_si_001.pdf]

# Supporting Information

## Cov<sup>2</sup>MS: an automated, and quantitative matrix-independent assay for mass spectrometric measurement of SARS-CoV-2 nucleocapsid protein.

Bart Van Puyvelde <sup>1</sup>, Katleen Van Uytfanghe <sup>2</sup>, Laurence Van Oudenhove <sup>3</sup>, Ralf Gabriels <sup>4,5</sup>, Tessa Van Royen <sup>4,6</sup>, Arne Matthys <sup>4,6</sup>, Morteza Razavi <sup>7</sup>, Richard Yip <sup>7</sup>, Terry Pearson <sup>7</sup>, Nicolas Drouin <sup>8</sup>, Jan Claereboudt <sup>3</sup>, Dominic Foley <sup>9</sup>, Robert Wardle <sup>9</sup>, Kevin Wyndham <sup>9</sup>, Thomas Hankemeier <sup>8</sup>, Donald Jones <sup>10,11</sup>, Xavier Saelens <sup>4,6</sup>, Geert Martens <sup>12</sup>, Christophe P. Stove <sup>2</sup>, Dieter Deforce <sup>1</sup>, Lennart Martens <sup>4,5</sup>, Johannes P.C. Vissers <sup>9</sup>, N. Leigh Anderson <sup>7</sup>, Maarten Dhaenens <sup>1\*</sup>

### AUTHOR ADDRESS

<sup>1</sup> ProGenTomics, Laboratory of Pharmaceutical Biotechnology, Ghent University, 9000 Ghent, Belgium

<sup>2</sup> Laboratory of Toxicology, Department of Bioanalysis, Faculty of Pharmaceutical Sciences, Ghent University, 9000 Ghent, Belgium

<sup>3</sup> Waters Corporation, 2600 Antwerp, Belgium

<sup>4</sup> VIB-UGent Center for Medical Biotechnology, VIB, 9000 Ghent, Belgium

<sup>5</sup> Department of Biomolecular Medicine, Ghent University, 9000 Ghent, Belgium

<sup>6</sup> Department of Biochemistry and Microbiology, Ghent University, Ghent, Belgium

<sup>7</sup> SISCAPA Assay Technologies, Inc., Box 53309, Washington, DC 20009, United States of America and Victoria, BC Canada

<sup>8</sup> Division of Systems Biomedicine and Pharmacology, Leiden Academic Centre for Drug Research, Leiden University, 2333 AL Leiden, The Netherlands

<sup>9</sup> Waters Corporation, Wilmslow SK9 4AX, United Kingdom and Milford, MA 01757, United States of America

<sup>10</sup> Leicester Cancer Research Centre, RKCSB, University of Leicester, UK and John and Lucille van Geest biomarker facility, Cardiovascular Research Centre, Glenfield Hospital, Leicester LE1 7RH, United Kingdom

<sup>11</sup> The Department of Chemical Pathology and Metabolic Diseases, Level 4, Sandringham Building, Leicester Royal Infirmary, Leicester LE1 7RH, United Kingdom

<sup>12</sup> AZ Delta Medical Laboratories, AZ Delta General Hospital, 8800 Roeselare, Belgium

\*Corresponding author: [maarten.dhaenens@ugent.be](mailto:maarten.dhaenens@ugent.be)

---

**ABSTRACT:** The pandemic readiness toolbox needs to be extended, targeting different biomolecules, using orthogonal experimental set-ups. Here, we build on our Cov-MS effort using LC-MS, adding SISCAPA technology to enrich proteotypic peptides of the SARS-CoV-2 nucleocapsid (N) protein from trypsin-digested patient samples. The Cov<sup>2</sup>MS assay is compatible with most matrices including nasopharyngeal swabs, saliva, and plasma and has increased sensitivity into the attomole range, a 1000-fold improvement compared to direct detection in matrix. A strong positive correlation was observed with qPCR detection beyond a quantification cycle of 30-31, the level where no live virus can be cultured. The automatable sample preparation and reduced LC dependency allow analysis of up to 500 samples per day per instrument. Importantly, peptide enrichment allows detection of the N protein in pooled samples without sensitivity loss. Easily multiplexed, we detect variants and propose targets for Influenza A and B detection. Thus, the Cov<sup>2</sup>MS assay can be adapted to test for many different pathogens in pooled samples, providing longitudinal epidemiological monitoring of large numbers of pathogens within a population as an early warning system.

---

### Table of contents

Supplementary Methods..... S-2

Supplementary Figures and Tables ..... S-3

|    |                 |     |
|----|-----------------|-----|
| 46 | Figure S1.....  | S-3 |
| 47 | Table S1.....   | S-4 |
| 48 | Figure S2.....  | S-5 |
| 49 | Figure S3.....  | S-5 |
| 50 | Figure S4.....  | S-6 |
| 51 | Figure S5.....  | S-6 |
| 52 | Figure S6.....  | S-7 |
| 53 | Figure S7.....  | S-7 |
| 54 | References..... | S-8 |

55

## 56 **Supplementary Methods**

57

58 **Virus cultures.** MDCK (Madin–Darby canine kidney) cells were cultured and seeded in complete DMEM medium  
59 containing fetal bovine serum (FBS) and non-essential amino acids. The cells were seeded for confluency in a 225 ml  
60 Falcon flask at 37°C and 5% CO<sub>2</sub>. Upon reaching confluency, the medium was refreshed with serum-free DMEM  
61 containing 4 µg/ml of N-p-Tosyl-L-phenylalanine chloromethyl ketone (TPCK) and the adherent cells were infected  
62 with mouse-adapted H3N2 (X47) or mouse-adapted H1N1/2009 Pandemic influenza A virus. One day post infection,  
63 cytopathic effects were observed and the supernatant was harvested. The supernatant was centrifuged for 15 mins (4° C;  
64 300 x g) to pellet the cell debris and the clarified supernatant was pooled and frozen at -80°C. A hemagglutination assay  
65 was performed which revealed a titre of 29 and 24, respectively, for the X47 and H1N1/2009 pandemic virus-containing  
66 supernatant. For this assay, a 2-fold dilution series of the supernatant was made in PBS in a U-bottomed 96 well plate.  
67 PBS was used as a negative control. Fifty µl of 1% turkey RBC were added to 50 µl diluted supernatant sample and the  
68 mixture was incubated for 1 hr at room temperature, after which RBC agglutination was visually determined.

69 MDCK cells were cultured, seeded and infected according to the protocol outlined above. Cells were infected with  
70 B/Memphis/12/97, B/Washington/02/2019, or B/Phuket/3073/2013 and the cell culture supernatant was harvested and  
71 clarified as above, at 3 days post infection, when cytopathic effect was evident. Upon harvest, a hemagglutination assays  
72 were performed to confirm viral proliferation. Hemagglutination titers of 212, 28 and 27, respectively, were obtained  
73 for the B/Memphis/12/97, B/Washington/02/2019 and B/Phuket/3073/2013 virus preparations.

74

75 **RT-qPCR protocol.** RNA was extracted from nasopharyngeal swabs using a STARMag 96 x 4 Viral DNA/RNA 200  
76 C Kit (Seegene Technologies, Walnut Creek, CA, USA) on the Hamilton STARlet workstation, followed by real-time  
77 PCR using the Allplex SARS-CoV-2 assay. PCR amplification was performed using a CFX96 real-time thermal cycler  
78 (Bio-Rad Laboratories) and data were analysed with the SARS-CoV-2 Viewer (Seegene). The presence or absence of  
79 SARS-CoV-2 RNA was determined by RT-PCR combined with multiplexed fluorescent probing, in which three  
80 different SARS-CoV-2 genes i.e. E-gen (FAM), RdRP (Cal Red 610) and N gene (Quasar 670) and an internal control  
81 (HEX) were targeted.

82

83 **LC gradient.** For the 1-minute run, gradient elution was performed at 1 mL/min with initial inlet conditions at 7 %  
84 B, increasing to 40 % B over 0.3 min, followed by a column wash at 90 % B for 0.25 min and a return to initial conditions  
85 at 7 % B. The total run time was 0.8 min. For the 2-minute min run, gradient elution was performed at 0.8 mL/min with  
86 initial inlet conditions at 5 % B, increasing to 15 % B from 0.15 to 0.35 min and at a steady state for 0.25 min.  
87 Subsequently, over 0.4 min, gradient B was increased to 25%, followed by a column wash at 90 % B for 0.25 min and  
88 returning to initial conditions at 5 % B. The total run time was 1.8 min. For the 8-minute run, gradient elution was  
89 performed at 0.6 mL/min with initial inlet conditions at 5 % B, increasing to 33 % B over 5.5 min, followed by a column  
90 wash at 90 % B for 1.4 min and a return to initial conditions at 5 % B. The total run time was 8 min. The Xevo TQ-XS  
91 conditions were as follows: capillary voltage 0.5 kV, source temperature 150° C, desolvation temperature 600° C, cone  
92 gas flow 150 L/h, and desolvation gas flow 1000 L/h. The MS was calibrated at unit mass resolution for MS1 and MS2.  
93 Endogenous and the corresponding stable isotope labelled peptides were detected using MRM acquisition with  
94 experimental details described in **Table S1**.

95

96 **Dilution series.** A serial dilution was performed using the SARS-CoV-2 negative nasopharyngeal swab pools to obtain  
97 a dilution series with the following concentrations of N: 10000, 2000, 400, 80, 16, 4, 2 and 0 amol/µL. Since each

98 dilution starts from 180  $\mu$ L of sample, the theoretical amount of sample loaded on column is calculated as following:  
 99  $= (180 \mu\text{L} * X \text{ amol}/\mu\text{L}) / (50 \mu\text{L}) * 10 \mu\text{L}$ . For example a 2 amol/ $\mu$ L sample corresponds to 72 amol NCAP on column.

100

101 **Intra- and inter-day precision** was determined by Waters Corporation using the SARS-CoV-2 RUO kit <sup>1</sup>. In short,  
 102 20  $\mu$ L of denaturant mixture (1 % (w/v) RapiGest [Waters Corporation, Milford, MA]) in 500 mM ammonium  
 103 bicarbonate were aliquoted into a 96-well plate. Next, 180  $\mu$ L of the NCAP dilutions were pipetted into the same plate,  
 104 followed by a shaking step of 30 seconds at 1200 rpm and an incubation step of 15 min at 56°C. After cooling the plate  
 105 for 5 minutes, 20  $\mu$ L trypsin solution (5 mg/ml trypsin in 10 mM HCl) was added. After mixing at 1200 rpm for 30 s, the  
 106 samples were digested at 37°C for 30 min and thereafter quenched by addition of 20  $\mu$ L trypsin stopping agent (0.5  
 107 mg/ml of Tosyl-L-lysyl-chloromethane hydrochloride in 10 mM HCl). The sample plate was mixed at 1200 rpm for 5  
 108 minutes, before adding 20  $\mu$ L of SIL peptide mixture solution and mixing again on a shaker at 1200 rpm for 30 s. Finally,  
 109 SISCAPA peptide enrichment was performed by adding 10  $\mu$ L of ADETQALPQR and AYNVTQAFGR antibodies.

110

111 **Sample pooling.** A dozen of nasopharyngeal patient samples screened negative for SARS-CoV-2 using RT-qPCR (Ct  
 112 > 40) were pooled to create five different dilutions, i.e. 1/2, 1/4, 1/8, 1/16 and 1/32, starting from confirmed positive patient  
 113 samples with diverse viral loads (Ct 10, 15, 20, 23, 24, 25, 26, 27, 28, 29 and 30). To 180  $\mu$ L of undiluted sample seven  
 114 volumes of ice-cold acetone were added, followed by a centrifugation step of 10 minutes at 16,000g and 0°C. After  
 115 removing the supernatant, 50  $\mu$ L of trypsin digestion buffer was added before the sample was incubated at 37°C for 30  
 116 minutes. Afterwards, the sample was divided in five equal fractions of 10  $\mu$ L and to each of the fractions a different  
 117 amount of volume of negative digested patient samples were added (i.e. 10, 30, 70, 150 and 310  $\mu$ L). Each dilution was  
 118 then subjected to the SISCAPA peptide immuno-enrichment protocol using a similar amount of beads. The final elution  
 119 for all samples was performed in 50  $\mu$ L of 1% FA.

## 120 Supplementary Figures and Tables

121

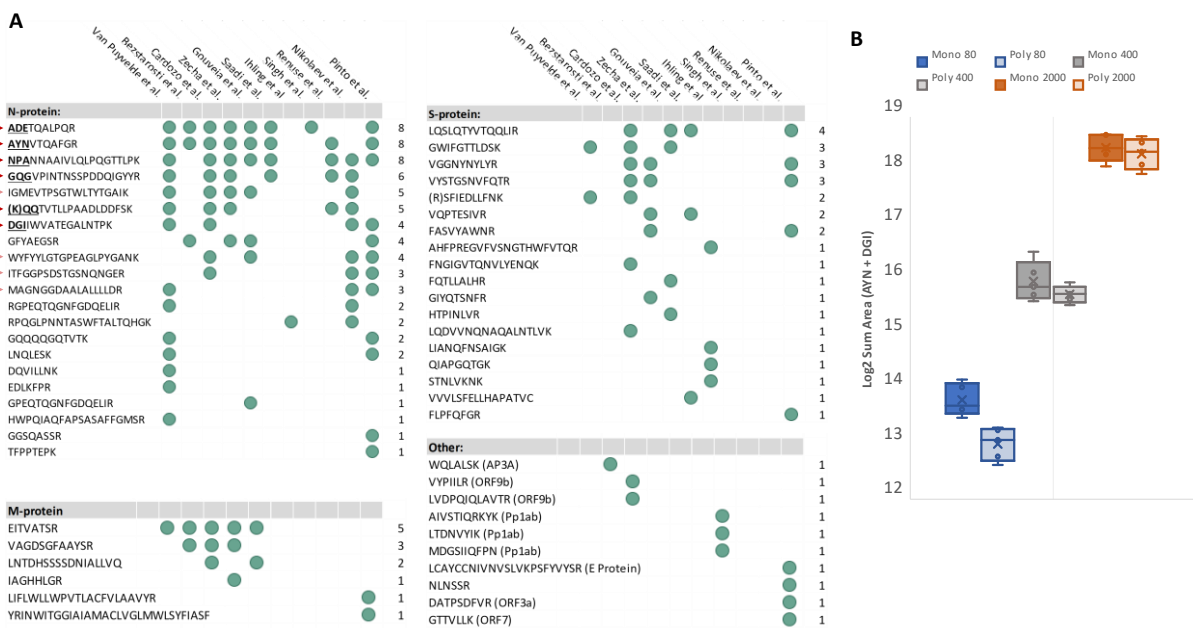

122

123 **Figure S1. A)** SARS-CoV-2 peptides detected in early MS-based efforts. Red arrowheads indicate peptides targeted  
 124 for SISCAPA antibody-based peptide enrichment (opaque: polyclonal only). The bold underlined initial three letters  
 125 depict the peptide abbreviations used throughout the manuscript. **B)** Intensity comparison (LogSum area under the curve)  
 126 between polyclonal and monoclonal antibodies against two target peptides (AYN and DGI) spiked in three different  
 127 concentrations (80-400-2000 amol/ $\mu$ L) in Bioer UTM background.

128 **Table S1.** MRM parameters for the six SISCAPA target peptides. Transitions highlighted in orange are used as stable isotope labelled standard.

| Peptide               | MRM                   | Cone Voltage (V) | Collision Energy (V) | Retention time (1min) | Retention time (2min) | Retention time (8min) | Scan window (1min) | Scan window (2min) | Scan window (8min) |
|-----------------------|-----------------------|------------------|----------------------|-----------------------|-----------------------|-----------------------|--------------------|--------------------|--------------------|
| ADETQALPQR            | 564.8 > 712.4 (y6)    | 35               | 24                   |                       | 0.48                  | 1.13                  |                    | 0.1-0.7            | 0.5-1.6            |
|                       | 564.8 > 584.4 (y5)    | 35               | 20                   |                       | 0.48                  | 1.13                  |                    | 0.1-0.7            | 0.5-1.6            |
|                       | 564.8 > 400.2 (y3)    | 35               | 17                   |                       | 0.48                  | 1.13                  |                    | 0.1-0.7            | 0.5-1.6            |
|                       | 572.3 > 407.2 (y3)    | 35               | 17                   |                       | 0.48                  | 1.13                  |                    | 0.1-0.7            | 0.5-1.6            |
| AYNVTQAFGR            | 563.8 > 892.5 (y8)    | 35               | 17                   | 0.4                   | 0.72                  | 2.43                  | 0.15-0.8           | 0.5-0.9            | 1.9-2.9            |
|                       | 563.8 > 778.4 (y7)    | 35               | 17                   | 0.4                   | 0.72                  | 2.43                  | 0.15-0.8           | 0.5-0.9            | 1.9-2.9            |
|                       | 563.8 > 679.4 (y6)    | 35               | 20                   | 0.4                   | 0.72                  | 2.43                  | 0.15-0.8           | 0.5-0.9            | 1.9-2.9            |
|                       | 563.8 > 349.2 (b3)    | 35               | 17                   | 0.4                   | 0.72                  | 2.43                  | 0.15-0.8           | 0.5-0.9            | 1.9-2.9            |
|                       | 571.3 > 689.3 (y6)    | 35               | 20                   | 0.4                   | 0.72                  | 2.43                  | 0.15-0.8           | 0.5-0.9            | 1.9-2.9            |
| GQGVPIINTNSSPDDQIGYYR | 727.7 > 1126.5 (y9)   | 35               | 23                   |                       | 0.81                  | 2.62                  |                    | 0.6-1              | 2.1-3.1            |
|                       | 727.7 > 558.3 (y4)    | 35               | 23                   |                       | 0.81                  | 2.62                  |                    | 0.6-1              | 2.1-3.1            |
|                       | 727.7 > 563.8 (y9++)  | 35               | 23                   |                       | 0.81                  | 2.62                  |                    | 0.6-1              | 2.1-3.1            |
|                       | 727.7 > 342.2 (b4)    | 35               | 23                   |                       | 0.81                  | 2.62                  |                    | 0.6-1              | 2.1-3.1            |
|                       | 736.7 > 570.2 (y9++)  | 35               | 23                   |                       | 0.81                  | 2.62                  |                    | 0.6-1              | 2.1-3.1            |
| KQQTVTLPAADLDDFSK     | 664.0 > 1078.5 (y10)  | 35               | 18                   | 0.44                  | 1.18                  | 3.8                   | 0.15-0.8           | 1-1.4              | 3.3-4.3            |
|                       | 664.0 > 539.8 (y10++) | 35               | 14                   | 0.44                  | 1.18                  | 3.8                   | 0.15-0.8           | 1-1.4              | 3.3-4.3            |
|                       | 664.0 > 799.5 (b7)    | 35               | 22                   | 0.44                  | 1.18                  | 3.8                   | 0.15-0.8           | 1-1.4              | 3.3-4.3            |
|                       | 671.3 > 545.2 (y10++) | 35               | 14                   | 0.44                  | 1.18                  | 3.8                   | 0.15-0.8           | 1-1.4              | 3.3-4.3            |
| NPANNAIVLQLPQGTTLPK   | 687.4 > 841.5 (y8)    | 35               | 17                   |                       | 1.19                  | 3.9                   |                    | 1-1.4              | 3.4-4.4            |
|                       | 687.4 > 766.4 (b8)    | 35               | 23                   |                       | 1.19                  | 3.9                   |                    | 1-1.4              | 3.4-4.4            |
|                       | 687.4 > 433.2 (b9)    | 35               | 20                   |                       | 1.19                  | 3.9                   |                    | 1-1.4              | 3.4-4.4            |
|                       | 696.0 > 851.4 (y8)    | 35               | 17                   |                       | 1.19                  | 3.9                   |                    | 1-1.4              | 3.4-4.4            |
| DGIWVATEGALNTPK       | 842.9 > 286.1 (b3)    | 35               | 30                   |                       | 1.24                  | 4.15                  |                    | 1-1.7              | 3.7-5              |
|                       | 562.3 > 700.4 (y7)    | 35               | 10                   |                       | 1.24                  | 4.15                  |                    | 1-1.7              | 3.7-5              |
|                       | 562.3 > 700.4 (y13++) | 35               | 18                   |                       | 1.24                  | 4.15                  |                    | 1-1.7              | 3.7-5              |
|                       | 852.4 > 289.1 (b3)    | 35               | 30                   |                       | 1.24                  | 4.15                  |                    | 1-1.7              | 3.7-5              |

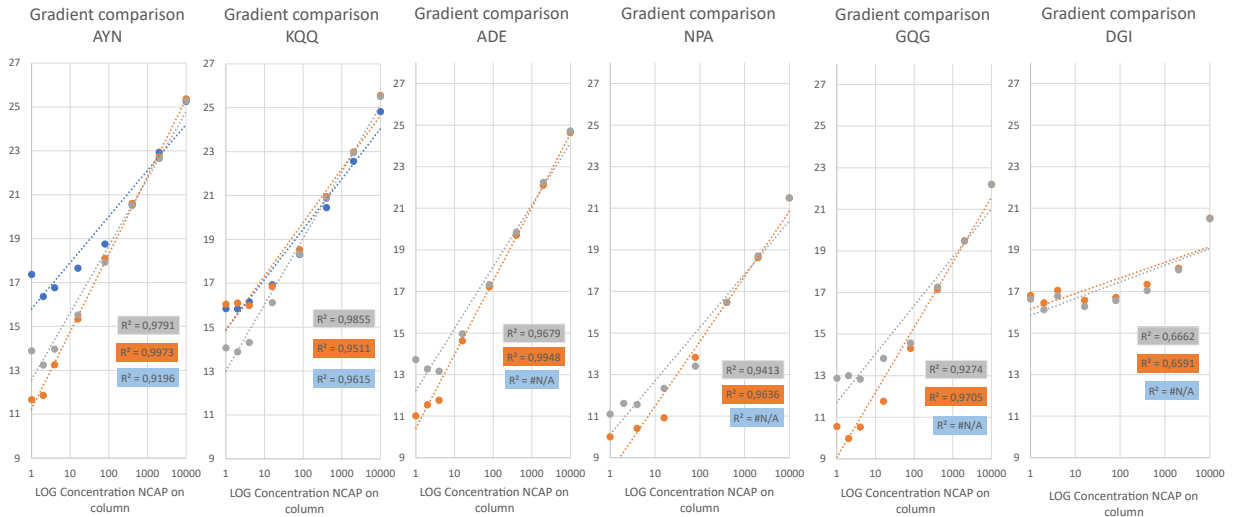

129  
 130 **Figure S2.** Response of six SISCAPA peptide targets (AYNVTQAFGR, KQQTVTLLPAAD-LDDFSK,  
 131 ADETQALPQR, NPANNAIIVLQLPQGTTLPK, GQGVPIINTSSPDDQIGYYR and DGIIWVATEGALNTPK)  
 132 immunopurified from a NCAP\_SARS2 dilution series and analysed using three different LC gradients (Blue: 1 min,  
 133 Orange: 2 min and Grey: 8 min) on the Xevo TQ-XS. Here, the x- and y-axis represent the LogConcentration of  
 134 Nucleoprotein and the corresponding summed peptide Log2Int of the MS signal extracted from Skyline, respectively.  
 135 Overall, a 2-minute gradient demonstrated the highest linearity, with the ADE and AYN peptides performing best in  
 136 terms of MRM sensitivity, especially in the low intensity range close to the lower limit of quantification. While the KQQ  
 137 peptide showed the best linearity using the 8-minute LC gradient, manual inspection of the data showed that the apparent  
 138 higher signal within the low intensity range for the shorter gradients was caused by carry-over in-between dilution series.

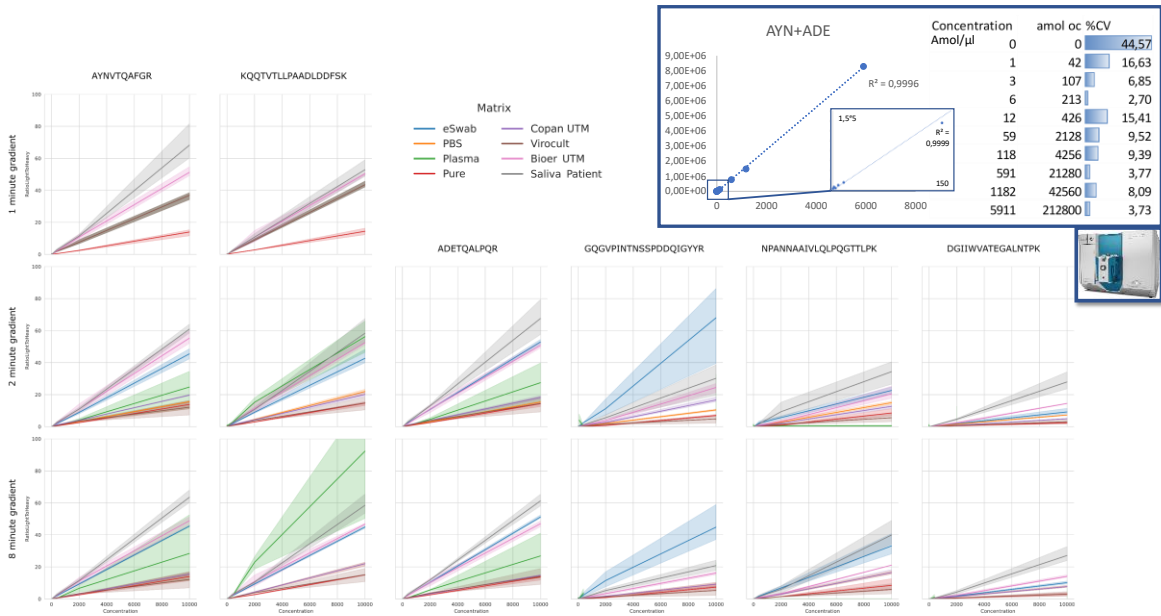

139  
 140 **Figure S3.** Light/heavy ratio of six SISCAPA peptides in eight different matrices (i.e. eSwab, PBS, Copan UTM,  
 141 Virocult, Bioer UTM, Plasma, 100 mM NH<sub>4</sub>HCO<sub>3</sub> and Saliva Patient) using three different gradients. Inset demonstrates  
 142 the inter-lab reproducibility of the method as a similar LOQ is achieved when an almost similar dilution series in Bioer  
 143 UTM is measured on a SCIEX 7500 Triple Quad system at Leiden University.

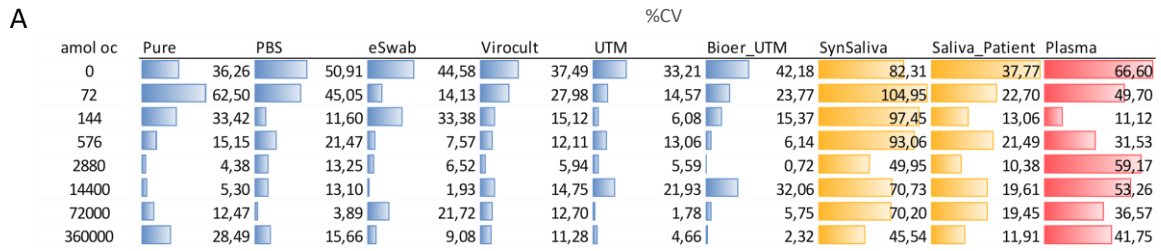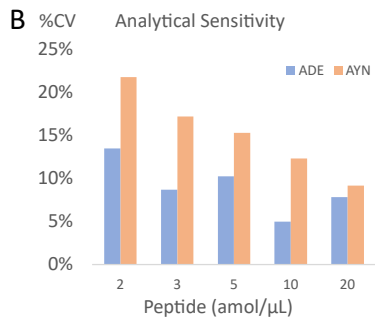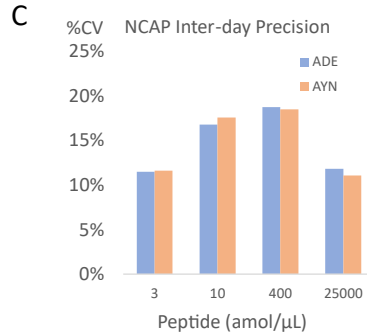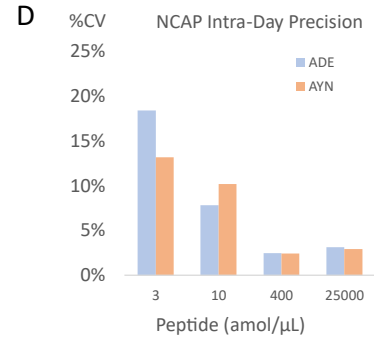

144

145 **Figure S4. (A)** Percent coefficient of variation (%CV) of recombinant N protein spiked in a dilution series in different  
 146 nasopharyngeal swab matrices (n=3): 100 mM NH<sub>4</sub>HCO<sub>3</sub> (referred to as “Pure”), PBS, Copan eSwab, Sigma Virocult,  
 147 Copan UTM, Bioer UTM, Synthetic saliva, Saliva patient and Plasma. **(B)** Analytical sensitivity of the target peptides  
 148 AYNVTQAFGR (AYN) and ADETQALPQR (ADE). The sensitivity assessment meets the acceptance criteria, with  
 149 precision at an LoQ of 3 amol/μL ≤17.2% and bias within ±19.8%. **(C&D)** Intra- and inter-day precision analysis on  
 150 the two main target peptides (ADE and AYN). The five-day precision assessment meets the acceptance criteria, with  
 151 inter-day and intra-day precision ≤17.4% across five runs.

**A** Patient population Ct frequency

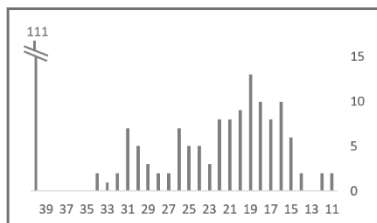

**B** qPCR

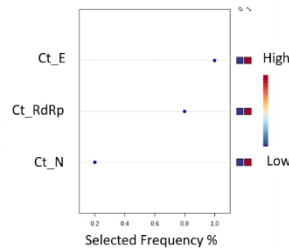

**C** MS

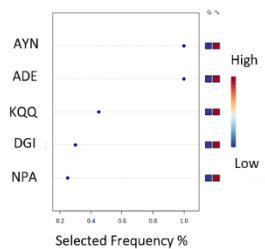

**D**

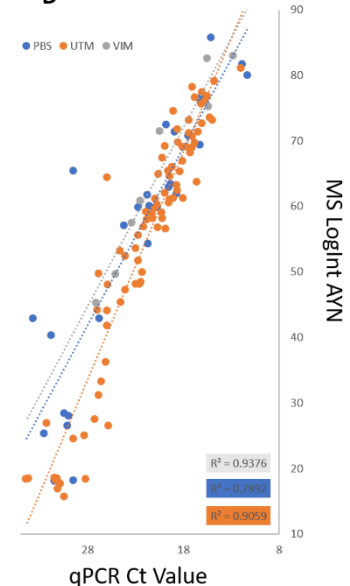

152

153 **Figure S5. A)** The distribution of the patient population over their measured E-gene Ct values. Contribution of the  
 154 different **B)** genes (qPCR) and **C)** peptides (MS) to diagnosis as expressed in Selected Frequency % (SF%). **D)** Linear  
 155 correlation between summed MRM LogInt AYN and Ct for the different media (PBS, UTM and VIM) in the sample  
 156 batch separately.

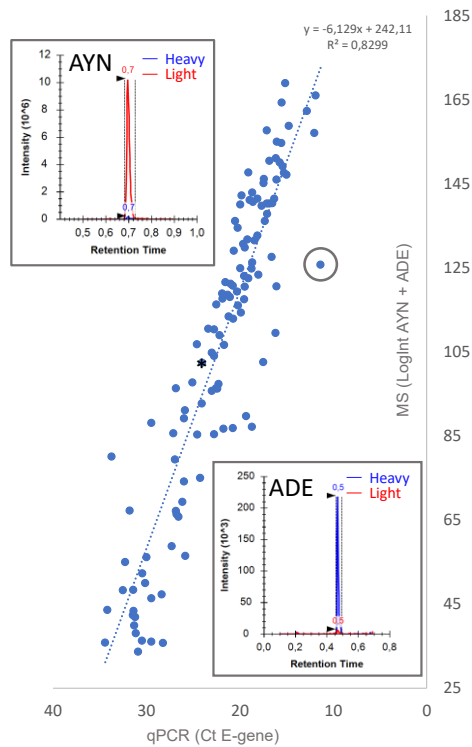

157

158 **Figure S6. (A)** Several patients had a summed ADE + AYN LogInt that was significantly lower than what was expected  
 159 based on the linear correlation with the Ct value. Manual inspection of one patient (with Ct 11, circled in grey), showed  
 160 how only the light signal of the ADE peptide and not the one from the AYN peptide had disappeared (insets).

161

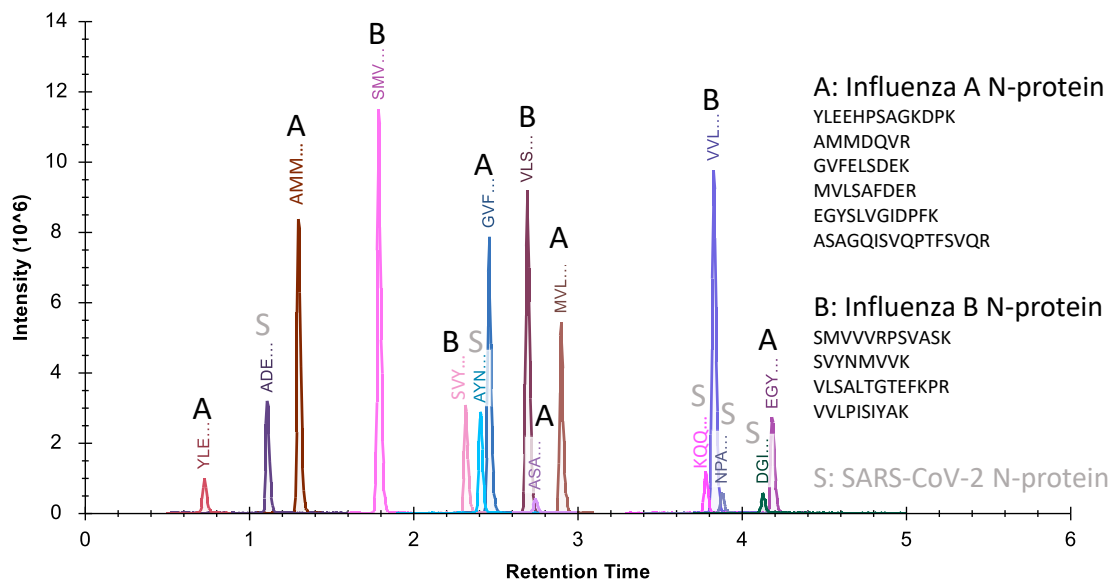

162

163 **Figure S7.** Preliminary data illustrating multiplexed analysis for SARS-CoV-2, Influenza A and Influenza B. The  
 164 Phase 1 workflow described for the previously published Cov-MS work was applied to viral cultures of different  
 165 Influenza A (H1N1/2009 and H3N2/X47) and Influenza B (Memphis, Phuket and Washington) strains. Proteotypic  
 166 peptides specific for both strains were selected and appended to the peptide selection of SARS-CoV-2. Subsequently,  
 167 an equimolar dilution series of recombinant nucleoproteins from these three viruses was created in NH<sub>4</sub>HCO<sub>3</sub> as a  
 168 proof of concept. The peptides from both Influenza strains ionized even better than those from SARS-CoV-2,  
 169 highlighting the potential of SISCAPA-LC-MS for multiplexed testing.

## References

- (1) Foley, D.; Wardle, R.; Ferries, S.; Pattison, R.; Warren, J.; Calton, L. J. Advancing Research with the SARS-CoV-2 LC-MS Kit (RUO) | Waters <https://www.waters.com/webassets/cms/library/docs/720007266en.pdf>.
